# Supplementary material for: Adherence to Mediterranean Diet, Physical Activity and Survival after Prostate Cancer Diagnosis
Source: PubMed Central journal article supplement (PMC7829941; doi:10.3390/nu13010243), 2021-01-16
Supplement: nutrients-13-00243-s001.pdf [file nutrients-13-00243-s001.pdf]

**Table S1.** Definition of physical activity according to levels of recreational and occupational physical activity.

| <b>Overall physical activity</b> | <b>Recreational physical activity</b> | <b>Occupational physical activity</b>                                                   |
|----------------------------------|---------------------------------------|-----------------------------------------------------------------------------------------|
| <b>High</b>                      | >7 hours/week                         | Any                                                                                     |
|                                  | Any                                   | Very strenuous (e.g. bricklayer, carpenter)<br>or strenuous (e.g. farmer, metal worker) |
|                                  | 5-7 hours/week                        | Average (e.g. cook, waiter)                                                             |
| <b>Moderate</b>                  | 5-7 hours/week                        | Standing (e.g. teacher, salesman/saleswoman)<br>or Mainly sitting (e.g. clerk)          |
|                                  | 2-4 hours/week                        | Average (e.g. cook, waiter)                                                             |
| <b>Low</b>                       | ≤4 hours/week                         | Standing (e.g. teacher, salesman/saleswoman)<br>or Mainly sitting (e.g. clerk)          |

**Table S2.** Nutrients median values and interquartile range (Q1-Q3), among 777 men diagnosed with prostate cancer, according to Mediterranean Diet Score (MDS) and physical activity. Italy, 1995-2002

| Daily nutrient intake     | Low MDS |               | High MDS |               | Kruskal-Wallis test |
|---------------------------|---------|---------------|----------|---------------|---------------------|
|                           | Median  | (Q1-Q3)       | Median   | (Q1-Q3)       |                     |
| Total proteins (g)        | 98.4    | (83.3-115.8)  | 90.2     | (74.9-110.0)  | <i>P</i> <0.001     |
| Vegetal proteins (g)      | 30.6    | (25.4-35.4)   | 35.2     | (29.2-42.4)   | <i>P</i> <0.001     |
| Animal proteins (g)       | 68.5    | (57.4-82.1)   | 54.3     | (43.8-67.9)   | <i>P</i> <0.001     |
| Total fats (g)            | 90.7    | (73.1-117.1)  | 88.2     | (71.2-113.9)  | <i>P</i> =0.180     |
| Vegetal fats (g)          | 40.5    | (28.7-52.3)   | 46.5     | (33.1-61.8)   | <i>P</i> <0.001     |
| Animal fats (g)           | 50.3    | (39.7-63.1)   | 39.4     | (31.3-51.8)   | <i>P</i> <0.001     |
| Total carbohydrates (g)   | 279.9   | (229.1-334.0) | 307.4    | (248.9-372.8) | <i>P</i> <0.001     |
| Sugars (g)                | 92.8    | (68.6-116.0)  | 98.0     | (77.4-122.8)  | <i>P</i> =0.014     |
| Starch (g)                | 185.7   | (153.8-222.8) | 202.1    | (161.5-257.3) | <i>P</i> <0.001     |
| Fibre (g)                 | 20.7    | (16.4-24.2)   | 25.9     | (21.6-31.5)   | <i>P</i> <0.001     |
| Saturated fatty acids (g) | 31.0    | (24.8-39.0)   | 27.2     | (21.4-36.7)   | <i>P</i> <0.001     |
| MUFA (g)                  | 39.4    | (30.4-50.3)   | 42.6     | (32.5-55.5)   | <i>P</i> =0.008     |
| PUFA (g)                  | 13.8    | (10.5-19.5)   | 11.7     | (9.1-15.8)    | <i>P</i> <0.001     |
| Cholesterol (mg)          | 358     | (288-455)     | 301      | (234-380)     | <i>P</i> <0.001     |
| Calcium (g)               | 1.18    | (0.91-1.46)   | 0.96     | (0.80-1.29)   | <i>P</i> <0.001     |
| Sodium (g)                | 2.43    | (1.99-3.01)   | 2.41     | (1.90-3.05)   | <i>P</i> =0.550     |
| Potassium (g)             | 3.90    | (3.29-4.49)   | 4.03     | (3.45-4.75)   | <i>P</i> =0.007     |
| Iron (mg)                 | 16.8    | (14.2-20.1)   | 16.4     | (13.2-19.3)   | <i>P</i> =0.058     |
| Thiamin (mg)              | 0.84    | (0.71-0.98)   | 0.87     | (0.74-1.05)   | <i>P</i> =0.054     |
| Riboflavin (mg)           | 1.64    | (1.37-2.07)   | 1.55     | (1.26-1.90)   | <i>P</i> =0.001     |
| Vitamin C (mg)            | 95.5    | (67.6-127.1)  | 131.8    | (102.1-174.9) | <i>P</i> <0.001     |
| Vitamin B6 (mg)           | 1.92    | (1.64-2.26)   | 1.94     | (1.65-2.31)   | <i>P</i> =0.386     |
| Folate (µg)               | 241     | (197-287)     | 274      | (231-321)     | <i>P</i> <0.001     |
| Niacin (mg)               | 18.0    | (14.9-20.6)   | 17.4     | (14.7-20.7)   | <i>P</i> =0.568     |
| α-Carotene (µg)           | 383     | (185-692)     | 675      | (363-1125)    | <i>P</i> <0.001     |
| β-Carotene (mg)           | 3.60    | (2.74-4.81)   | 4.93     | (4.01-6.21)   | <i>P</i> <0.001     |
| Vitamin D (µg)            | 3.07    | (2.33-3.99)   | 3.07     | (2.23-3.98)   | <i>P</i> =0.811     |
| Vitamin E (mg)            | 13.5    | (10.9-17.4)   | 15.6     | (12.6-20.2)   | <i>P</i> <0.001     |
| Alcohol (g)               | 52.4    | (28.1-77.8)   | 29.0     | (13.8-53.9)   | <i>P</i> <0.001     |
| Water (l)                 | 1.72    | (1.44-2.08)   | 1.70     | (1.39-2.01)   | <i>P</i> =0.429     |
| Total energy (kJ)         | 6362    | (5374-7559)   | 6194     | (5047-7431)   | <i>P</i> =0.144     |
